# Supplementary material for: High-performance humidity sensors from Ni(SO4)0.3(OH)1.4 nanobelts
Source: Royal Society of Chemistry journal article supplement (doi:10.1039/c4nr00277f), 2014-01-01
Supplement: c4nr00277f1.pdf [file c4nr00277f1.pdf]

## Electronic supplementary information

### High-performance humidity sensors from $\text{Ni}(\text{SO}_4)_{0.3}(\text{OH})_{1.4}$ nanobelts

Ming Zhuo, Yuejiao Chen, Tao Fu, Haonan Zhang, Zhi Xu, Qiuhong Li<sup>a\*</sup> and Taihong Wang<sup>b\*</sup>

Received (in XXX, XXX) Xth XXXXXXXXXX 20XX, Accepted Xth XXXXXXXXXX 20XX

DOI: 10.1039/b000000x

Key Laboratory for Micro-Nano Optoelectronic Devices of Ministry of Education Hunan University.

State Key Laboratory for Chemo/Biosensing and Chemometrics Hunan University.

<sup>a</sup>E-mail: liqiuhong2004@hotmail.com

<sup>b</sup>E-mail: thwang@iphy.ac.cn

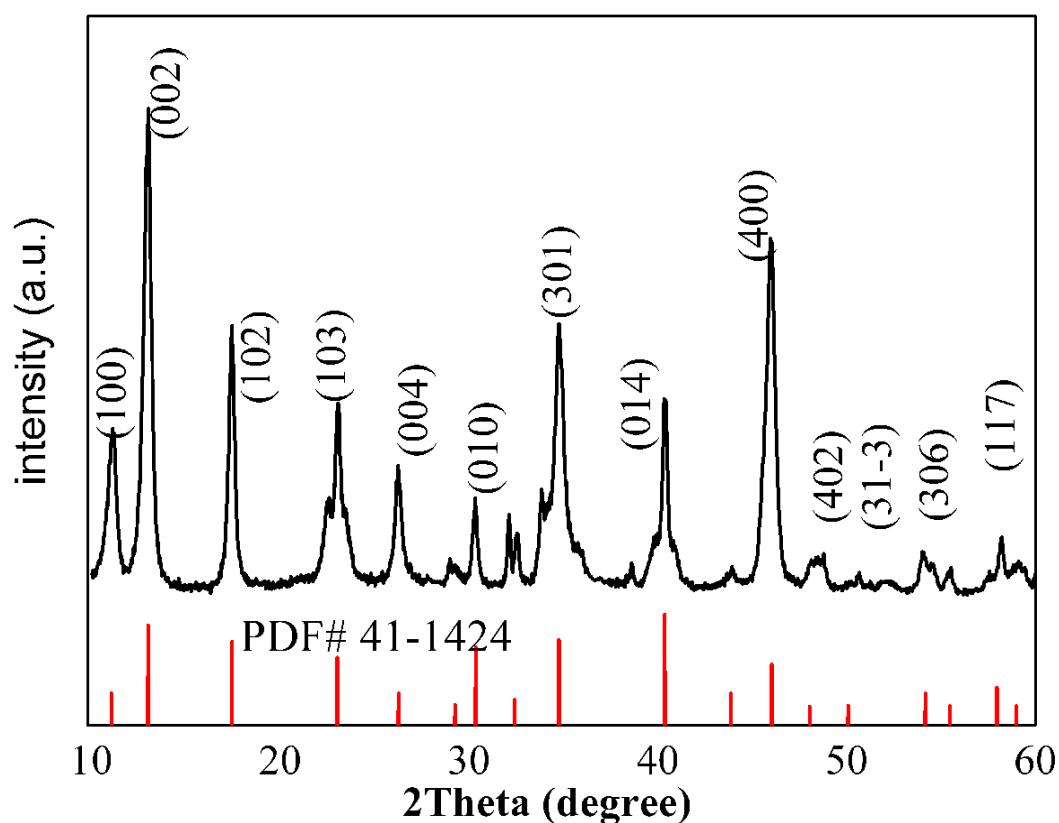

**Fig. S1.** The XRD pattern of the sample has been kept in air for about one year. It shows little change after storing in air ambient, shows good stability.

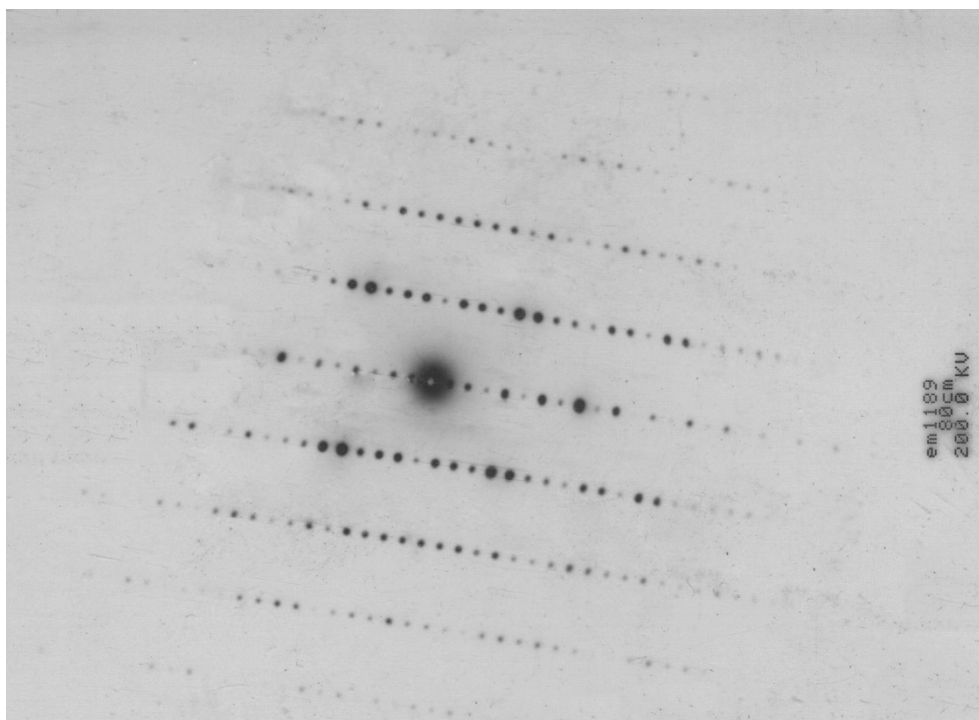

**Fig. S2.** The SAED pattern of the same nanobelt shown in Fig .1(d). It is a developed photo rather than an electronic form.

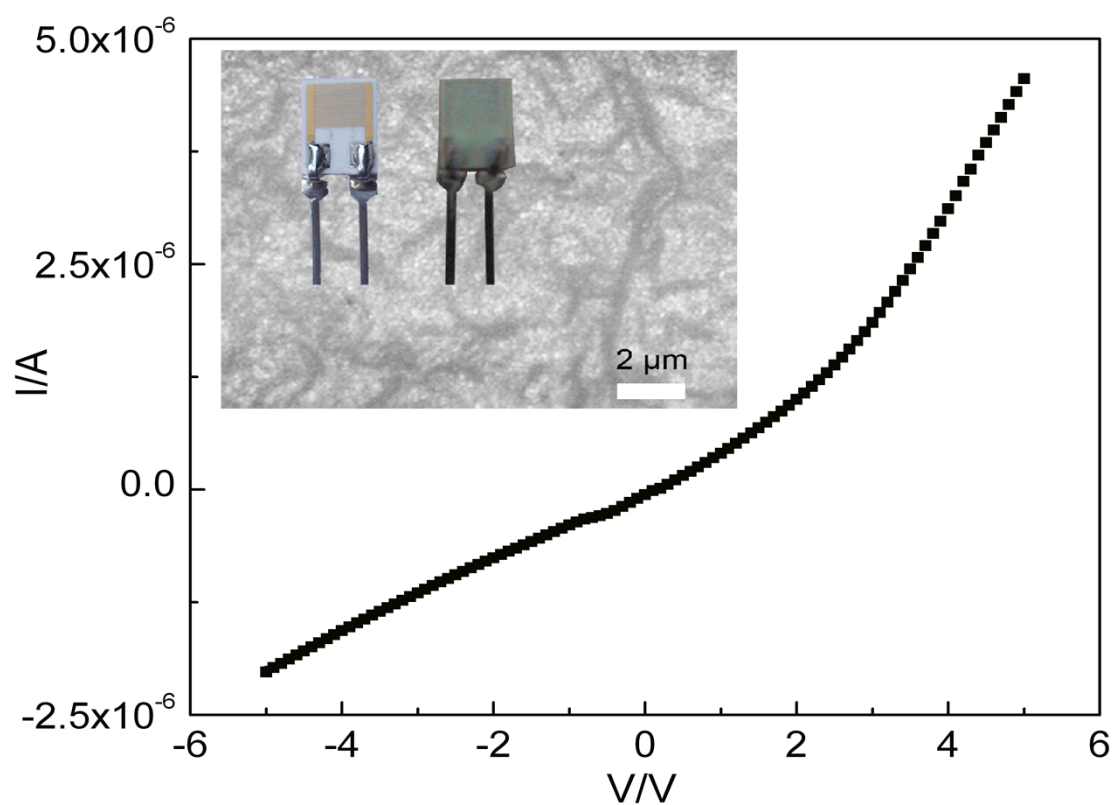

**Fig. S3**  $I$ - $V$  curve of the nanobelts film, and the humidity sensor without and with covering the film (left and right).

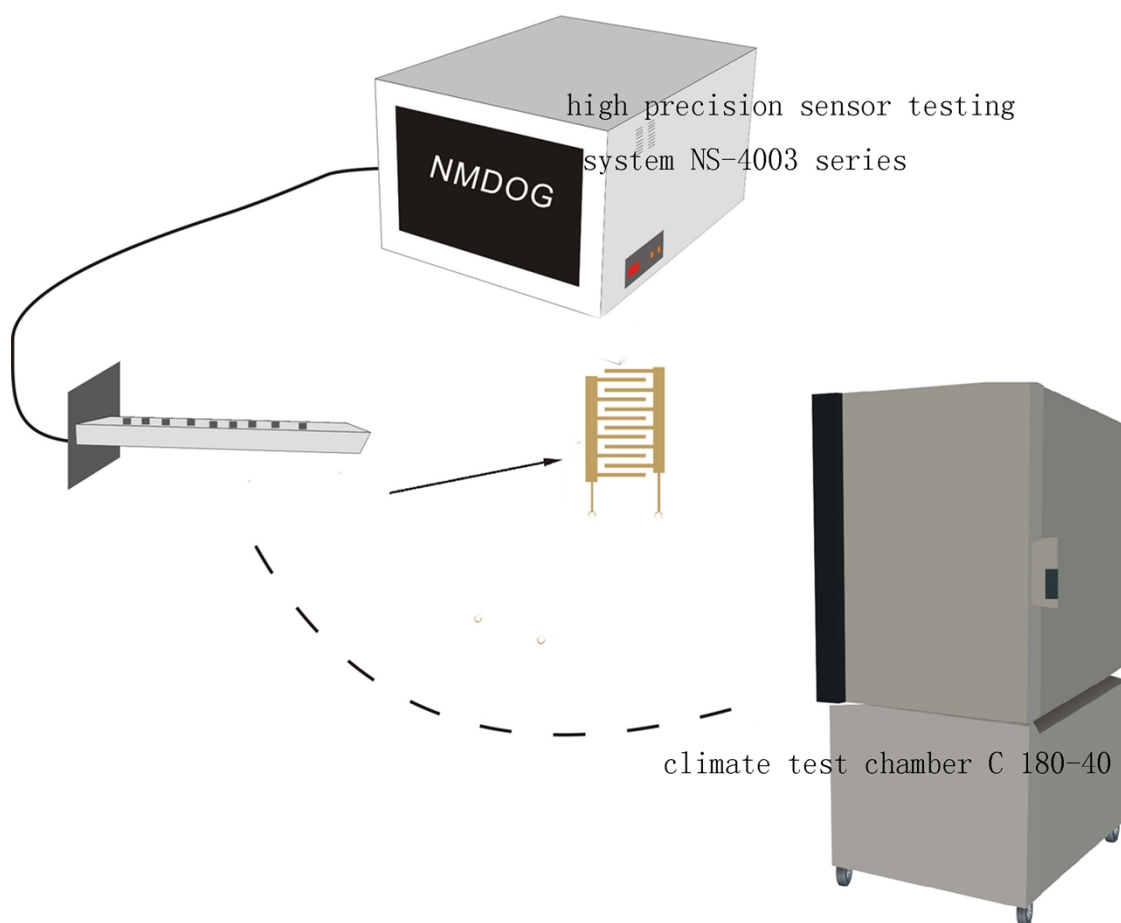

**Fig. S4.** The humidity sensor test system.

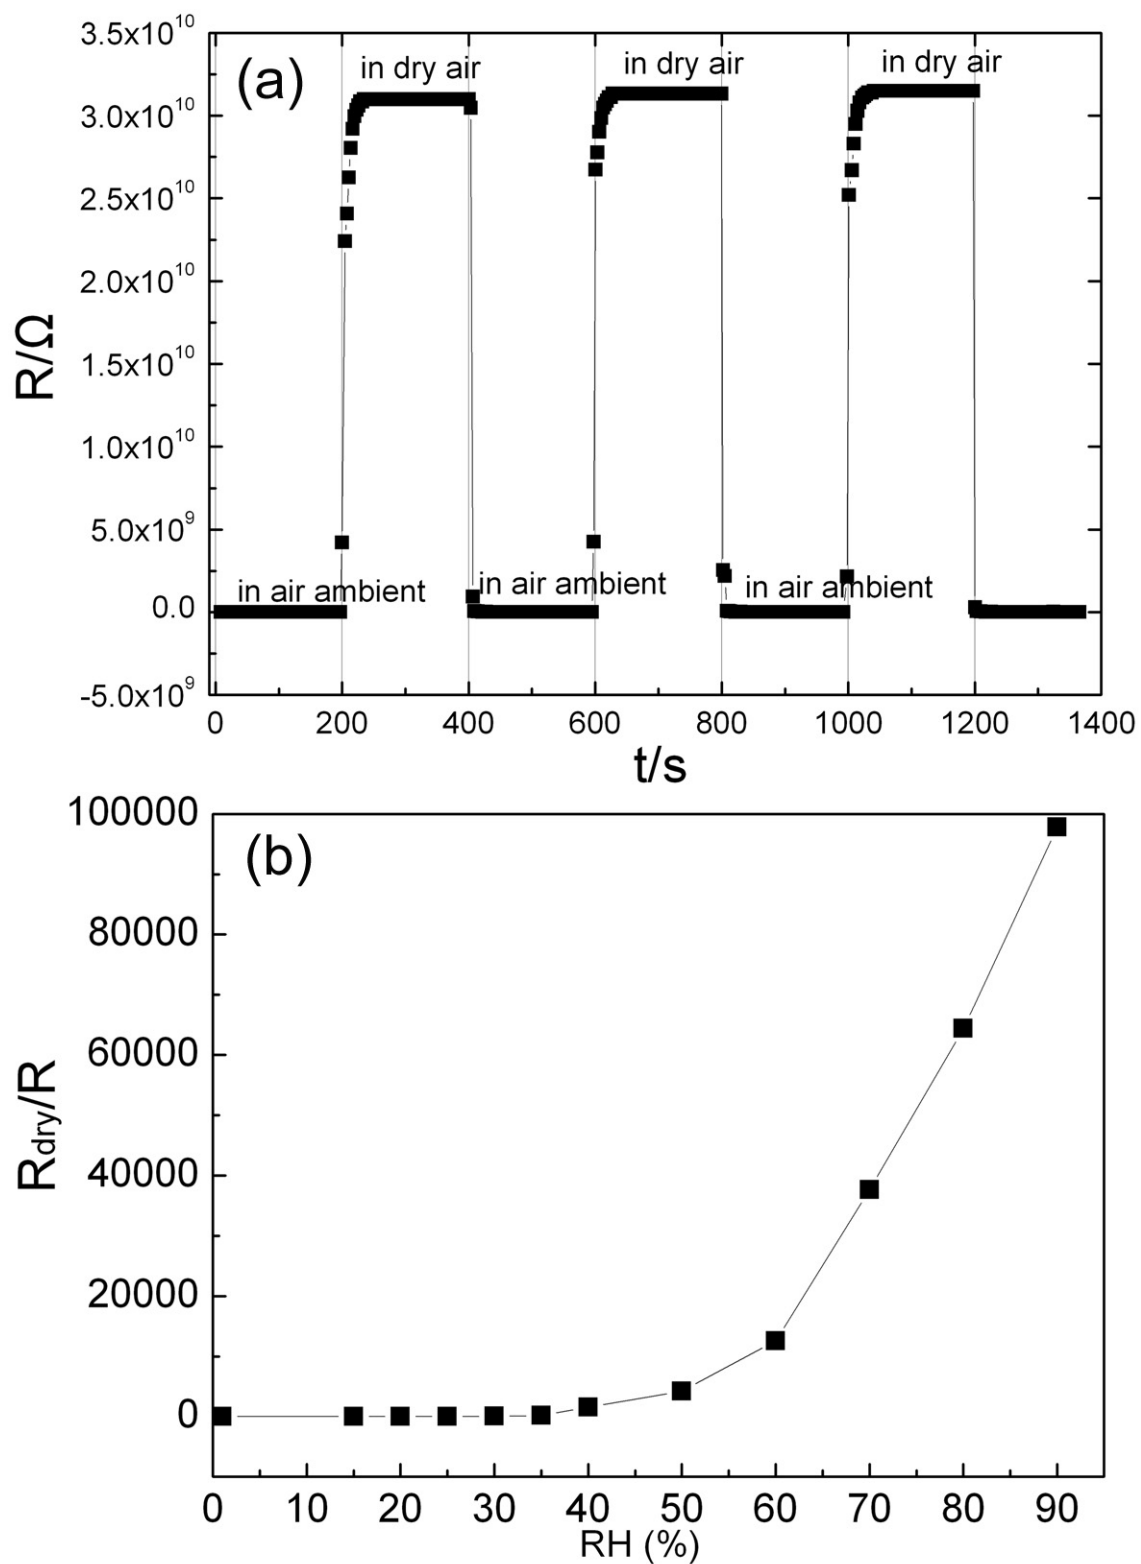

**Fig. S5.** (a) the real-time response of the sensor from air ambient to total dry air condition. (b). the corresponding sensitivity based on resistance in dry air. That is calculated to be 3.77, 14.93, 41.93, 59.68, 192.13, 1551.03, 4249.30, 12560.07, 37636.02, 64383.86 and 97830.36 respectively.

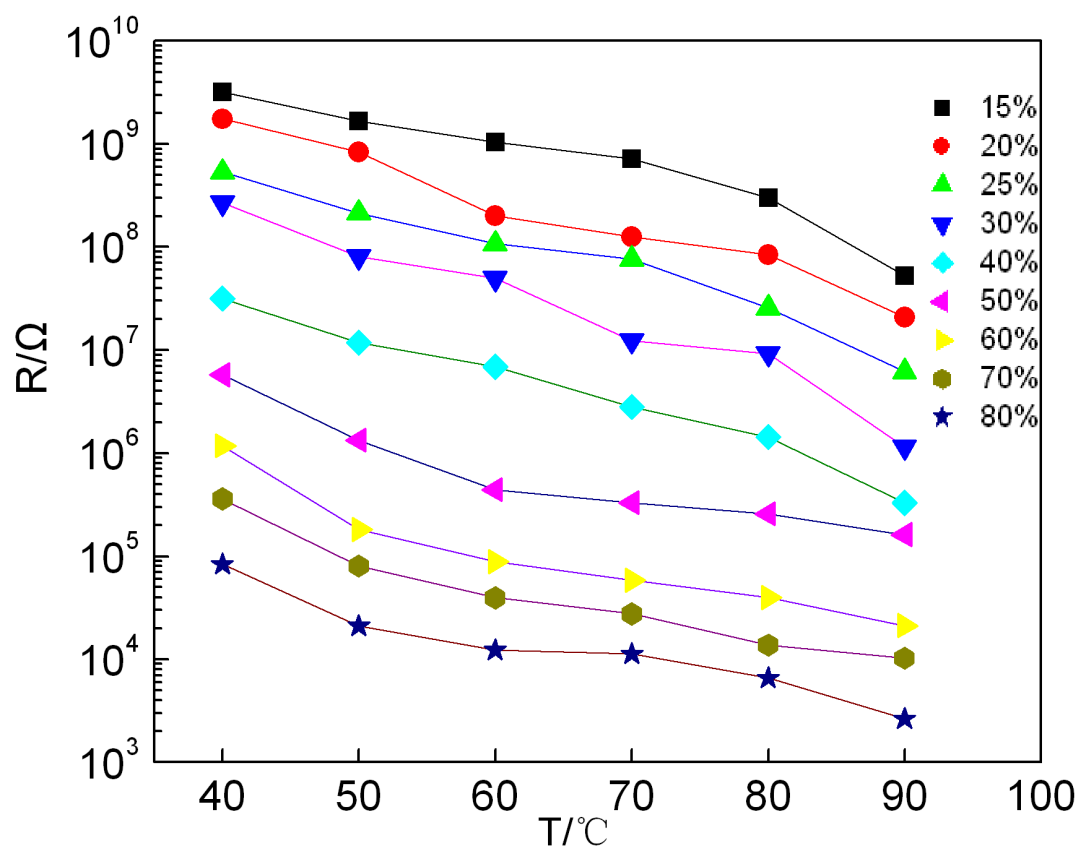

**Fig. S6.** It was extracted from Fig .3. The resistance decreased with increasing temperature under different RHs.

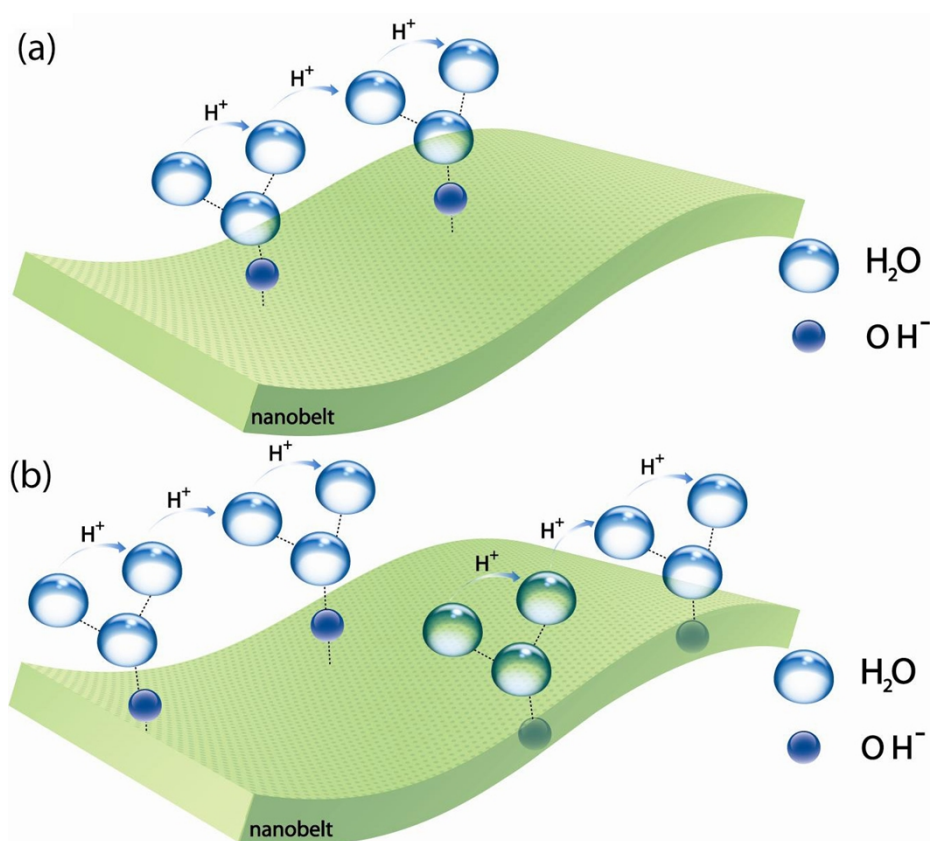

**Fig. S7.** The nanobelt with the chemical composition (a) not containing and (b) containing hydroxyl groups.
